# Supplementary figures and images for: X-ray spectroscopy characterization of cobalt stabilization within a monolayer carbon nitride in the oxygen evolution reaction
Source: Royal Society of Chemistry journal article supplement (doi:10.1039/d4cp04148h), 2025-01-01

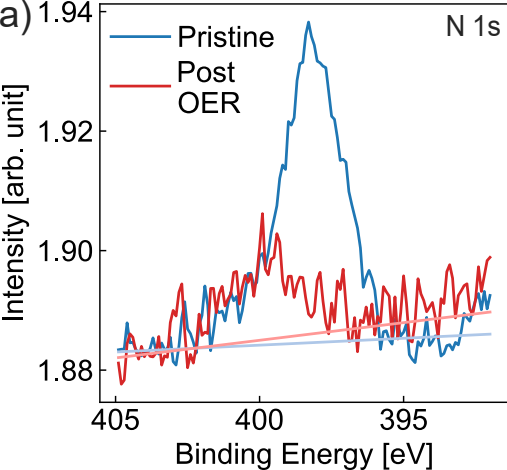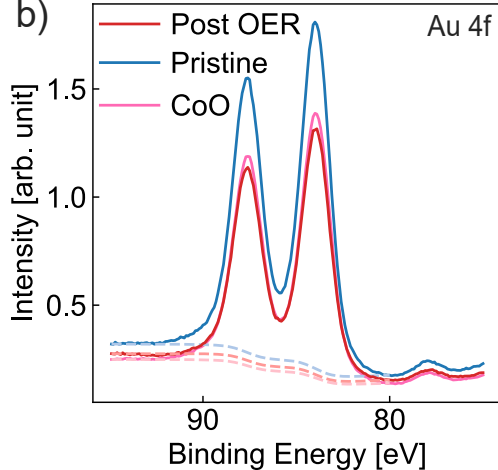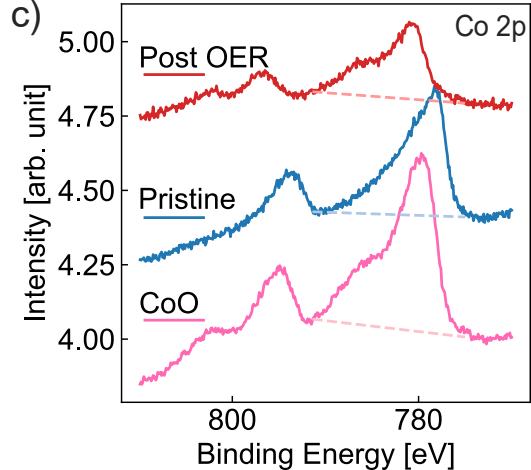

Supplement: d4cp04148h2.zip [file d4cp04148h2.zip]

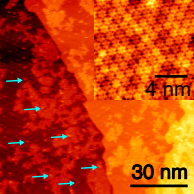

4 nm

30 nm

Supplement: d4cp04148h2.zip [file d4cp04148h2.zip]

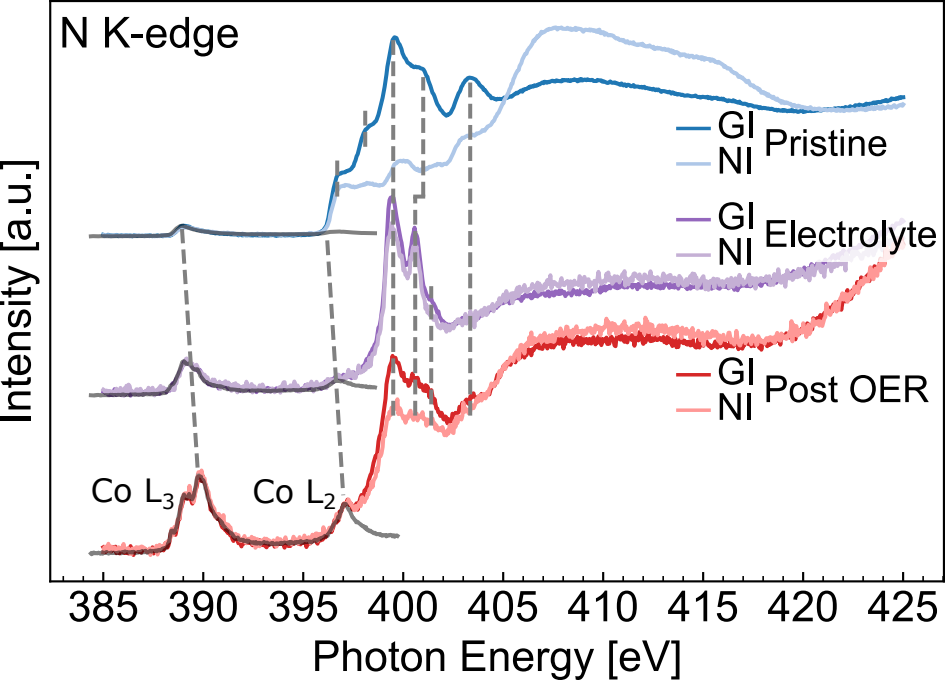

Supplement: d4cp04148h2.zip [file d4cp04148h2.zip]

a)

Intensity [arb. unit]

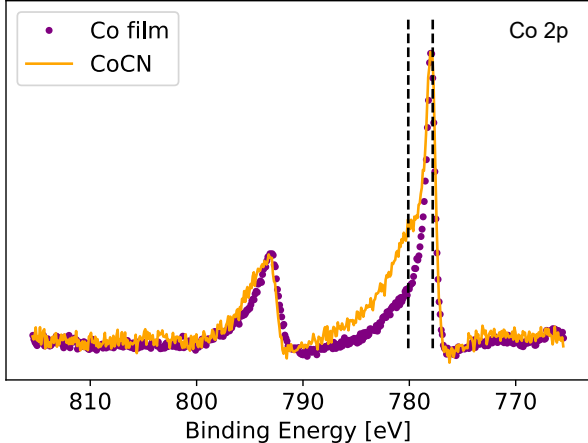

b)

Intensity [arb. unit]

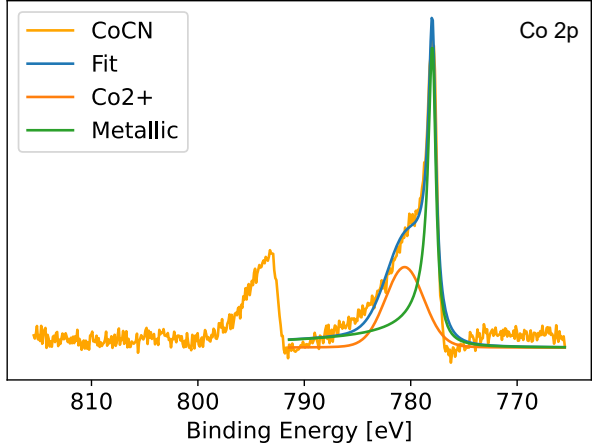

Supplement: d4cp04148h2.zip [file d4cp04148h2.zip]

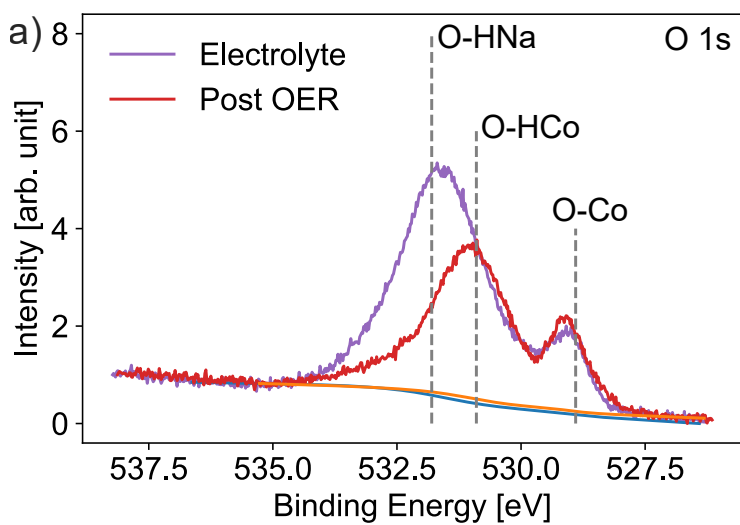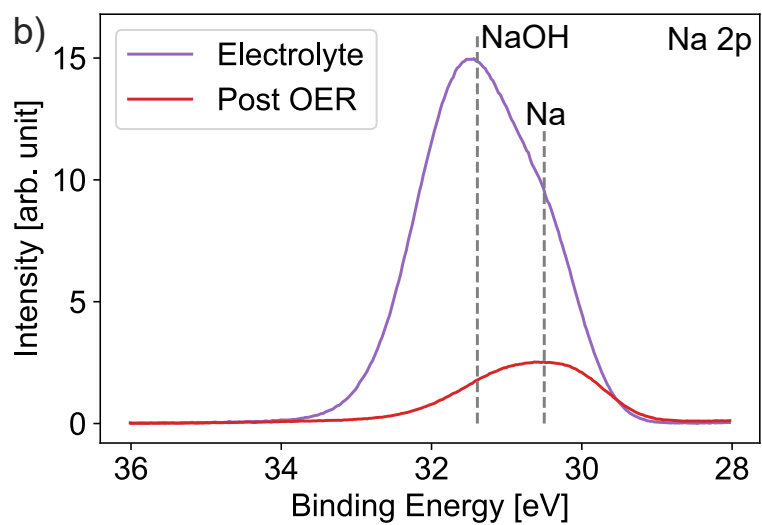

Supplement: d4cp04148h2.zip [file d4cp04148h2.zip]

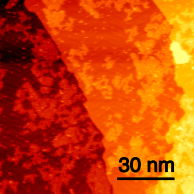

**30 nm**

Supplement: d4cp04148h2.zip [file d4cp04148h2.zip]

# ORR 100 scans

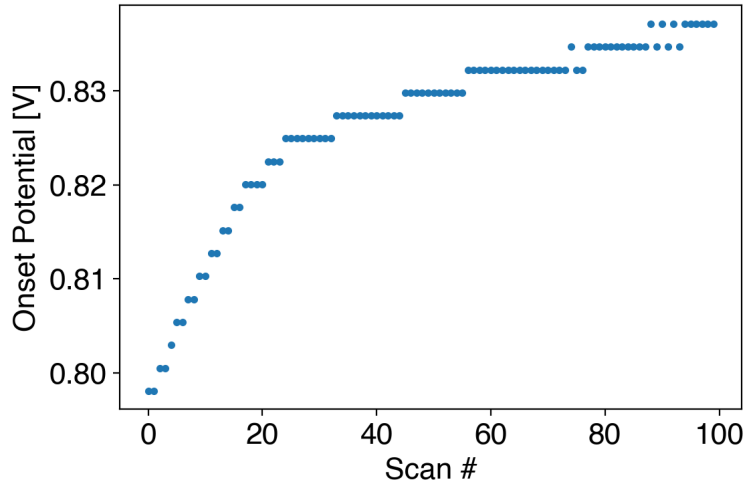

# ORR 100 scans

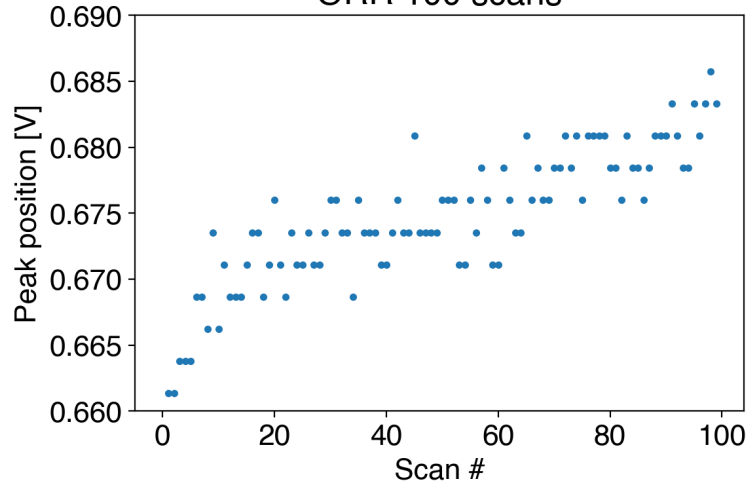

Supplement: d4cp04148h2.zip [file d4cp04148h2.zip]

Intensity [arb. unit]

— Pristine  
— Electrolyte  
— Post OER

C 1s  
 $h\nu = 386 \text{ eV}$

2.25  
2.00  
1.75  
1.50  
1.25  
1.00

292.5 290.0 287.5 285.0 282.5  
Binding Energy [eV]

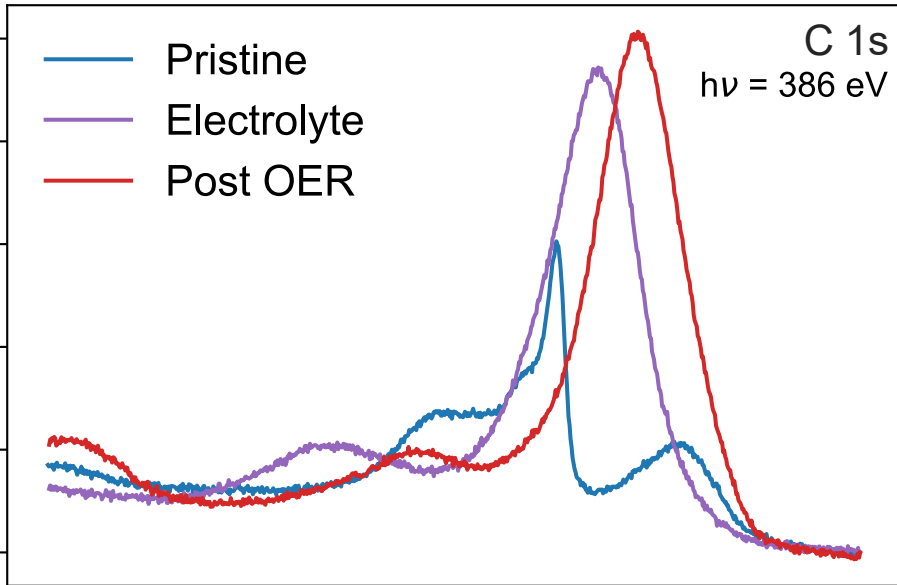

Supplement: d4cp04148h2.zip [file d4cp04148h2.zip]

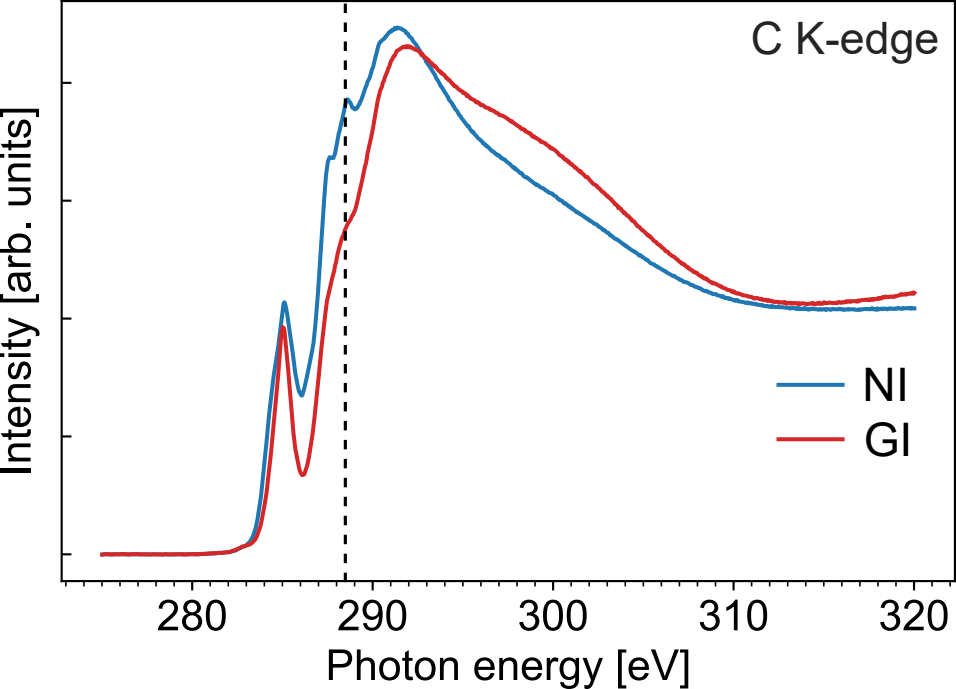

Supplement: d4cp04148h2.zip [file d4cp04148h2.zip]

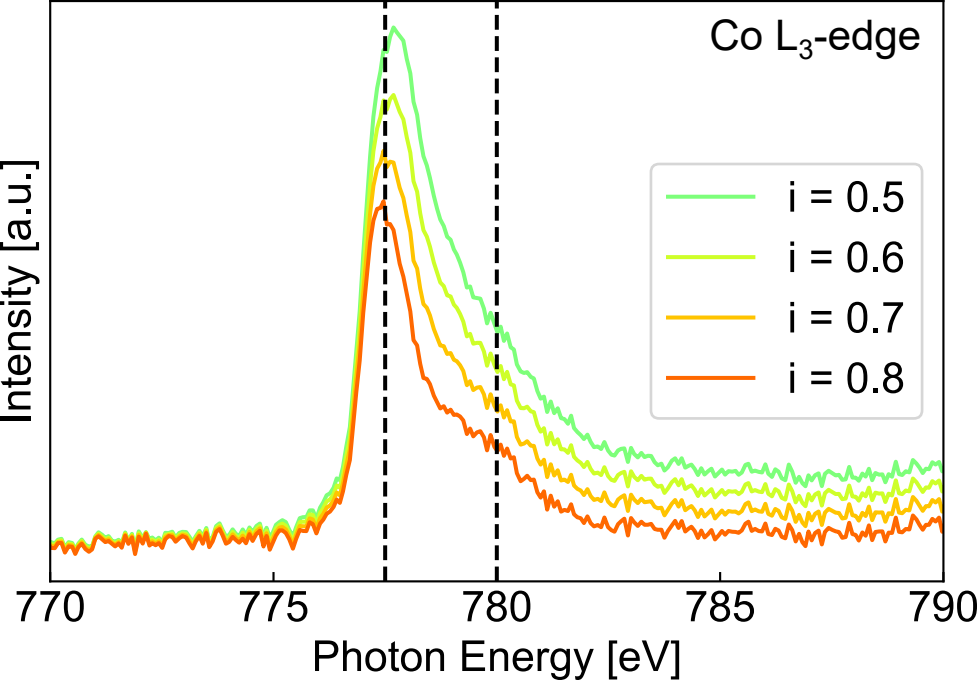

Supplement: d4cp04148h2.zip [file d4cp04148h2.zip]

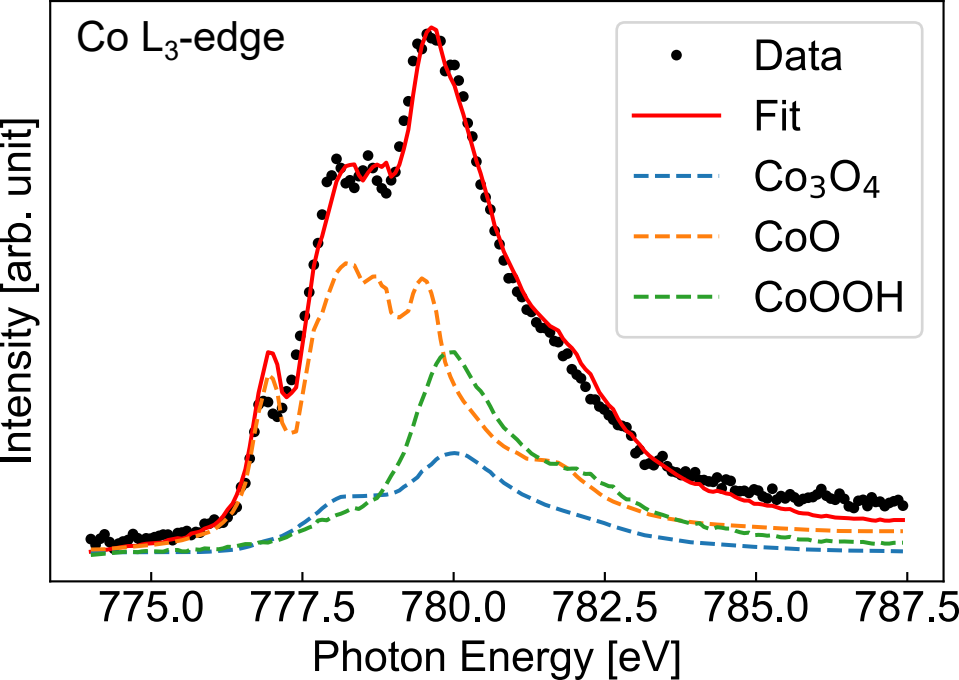

Supplement: d4cp04148h2.zip [file d4cp04148h2.zip]

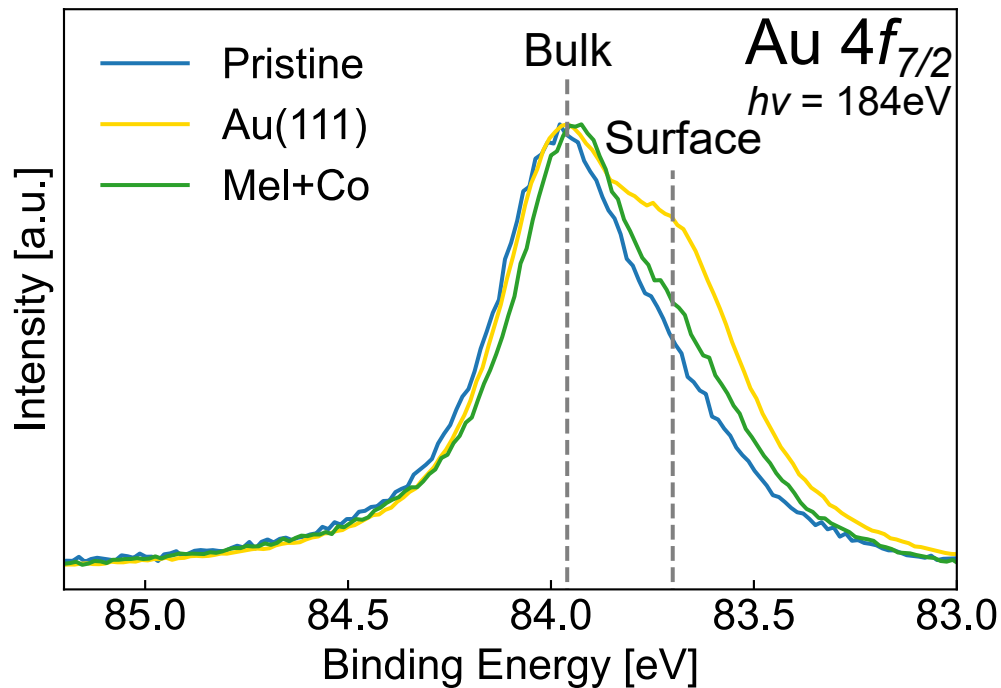

Supplement: d4cp04148h2.zip [file d4cp04148h2.zip]
